# Supplementary material
Source: PubMed Central journal article supplement (PMC5222974)

# Supplemental Figure 1

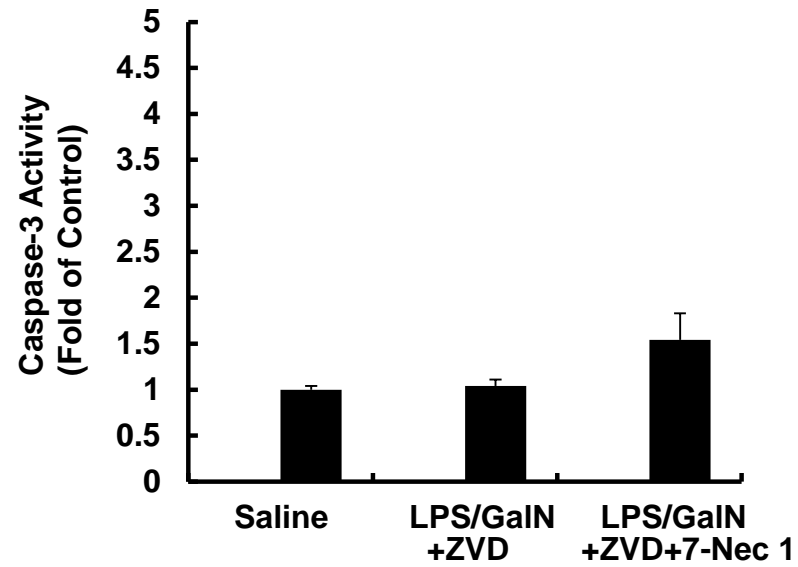

Supplement: mmc1.pdf [file mmc1.pdf]

**A**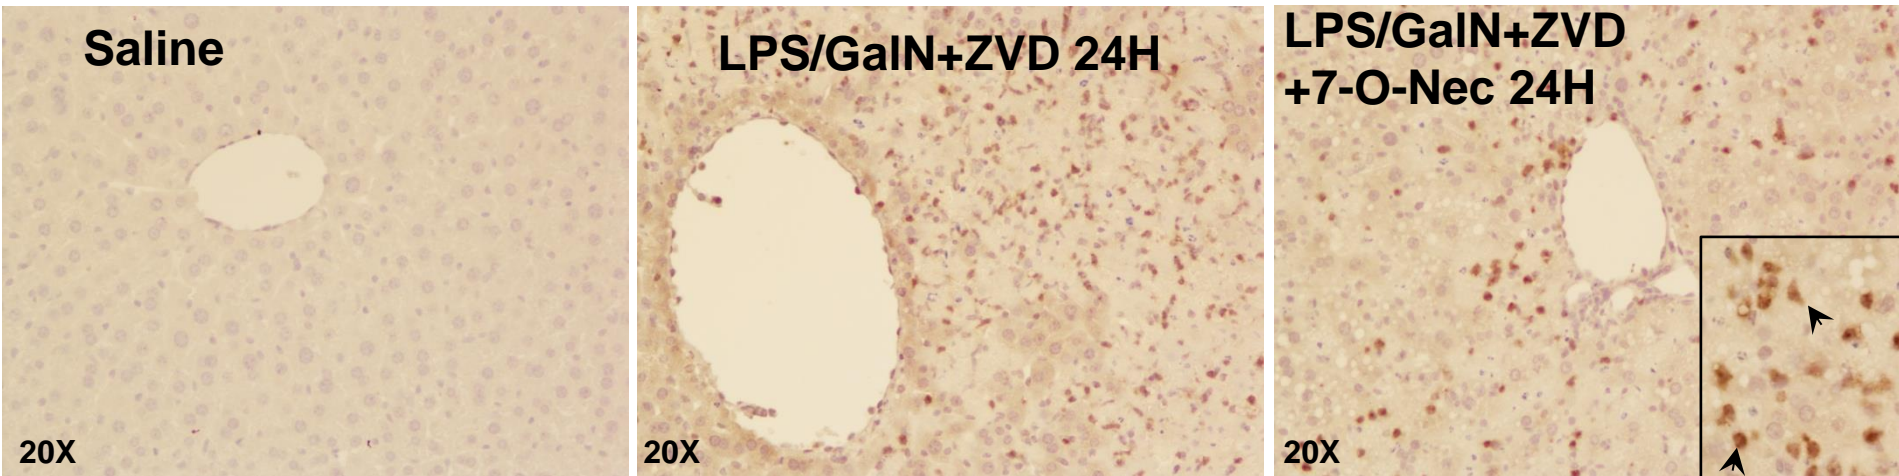**B**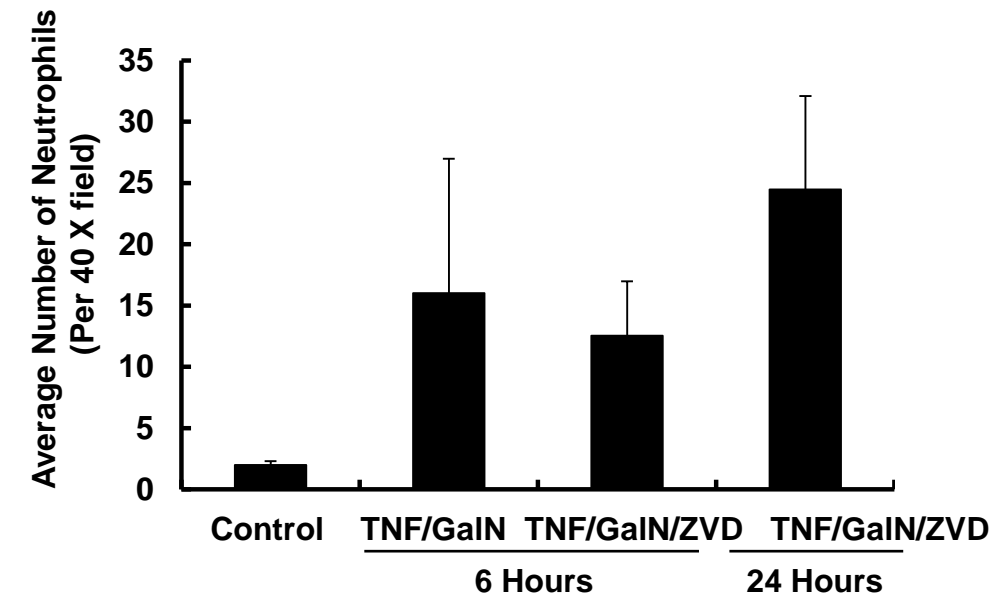**C**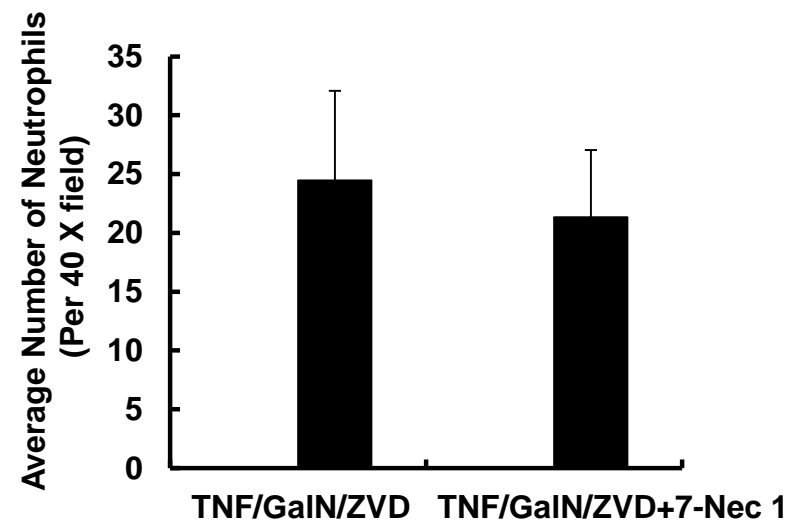

Supplement: mmc2.pdf [file mmc2.pdf]

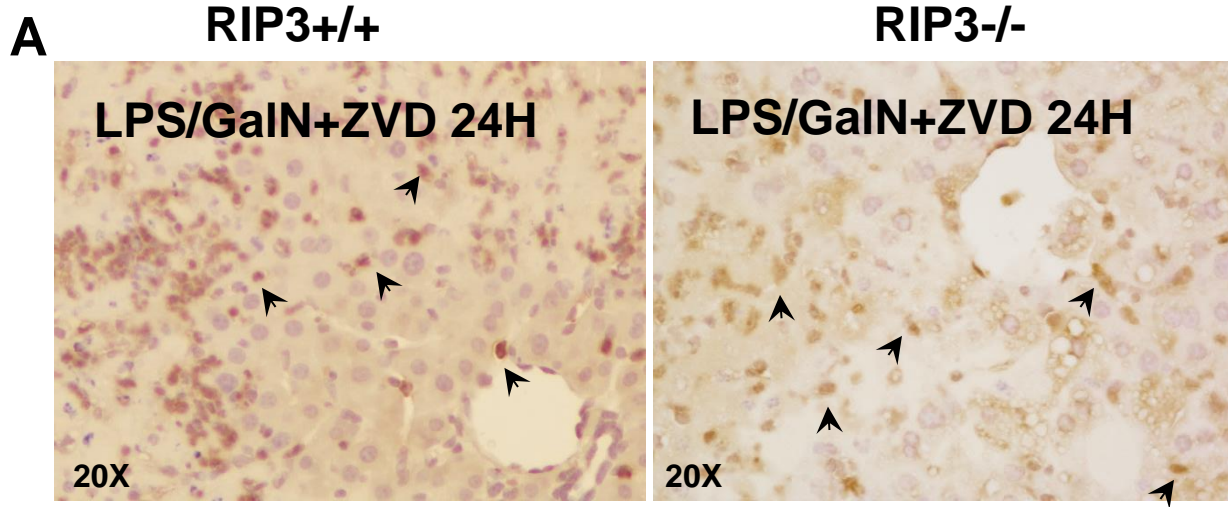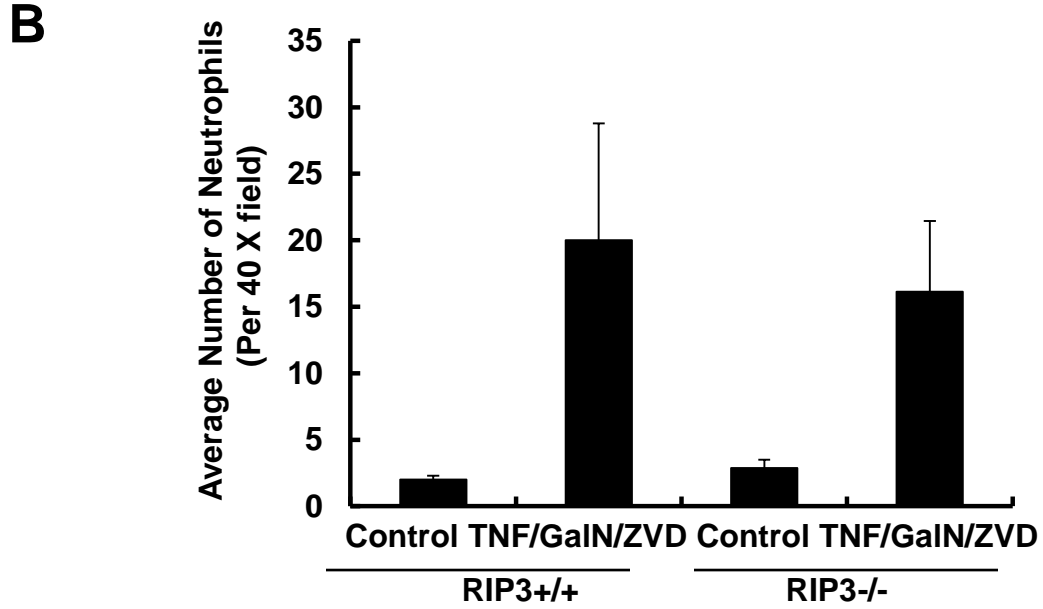

Supplement: mmc3.pdf [file mmc3.pdf]

# Supplemental Figure 4

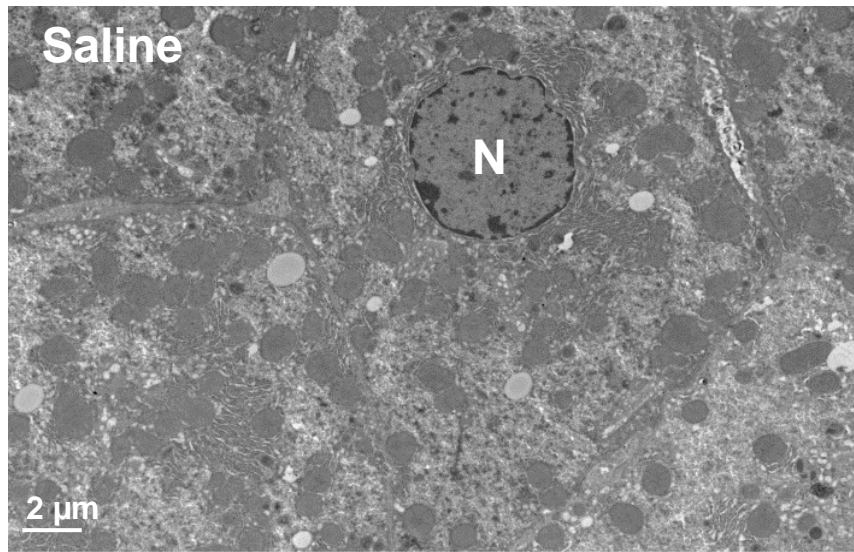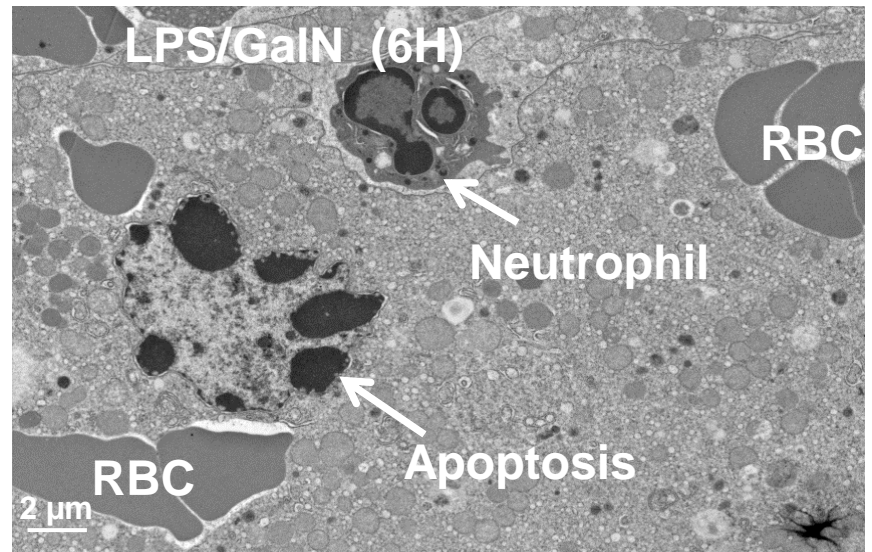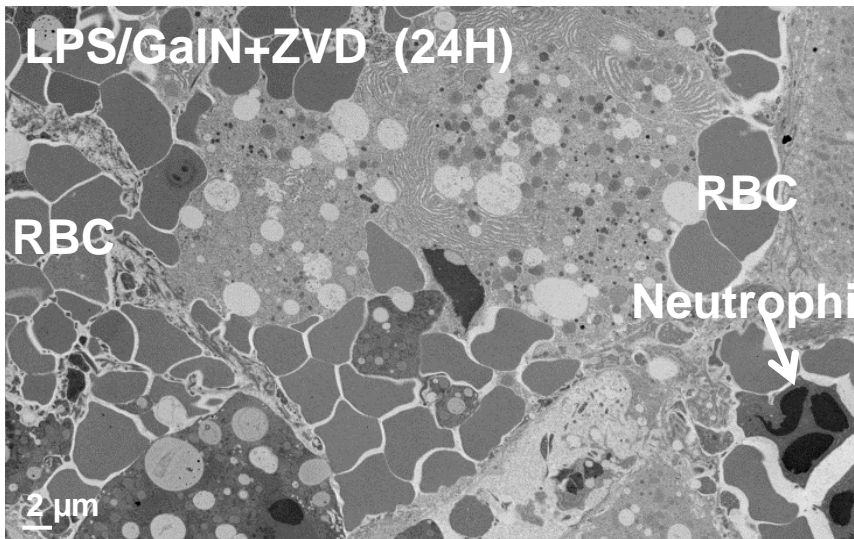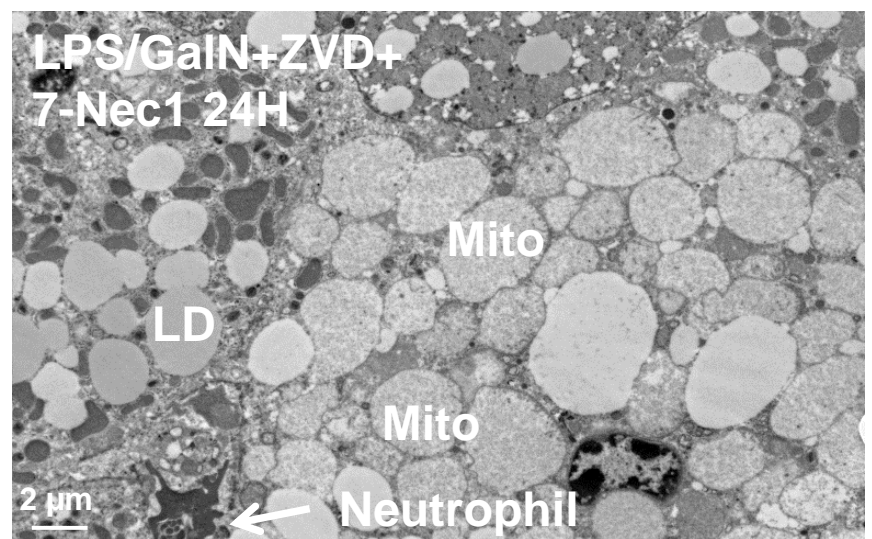

Supplement: mmc4.pdf [file mmc4.pdf]
